# Supplementary material for: Role of the membrane potential in mitochondrial protein unfolding and import
Source: PubMed Central journal article supplement (PMC6529458; doi:10.1038/s41598-019-44152-z), 2019-05-21
Supplement: 41598_2019_44152_MOESM1_ESM.pdf [file 41598_2019_44152_MOESM1_ESM.pdf]

(Revised version)

Supplementary Information

## Role of the membrane potential in mitochondrial protein unfolding and import

Takehiro K. Sato, Shin Kawano, & Toshiya Endo

Supplementary Figures S1

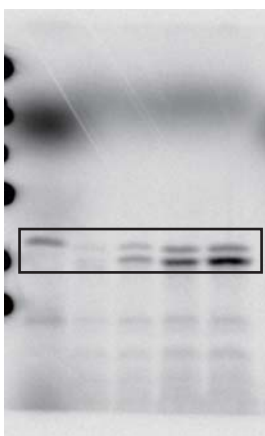

WT (E15)

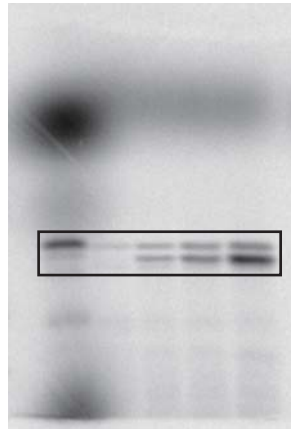

E15G

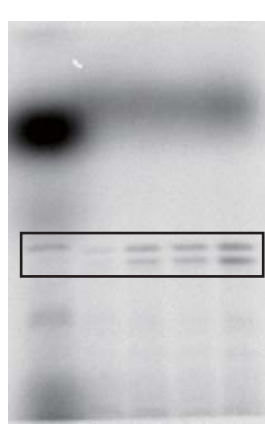

E15L

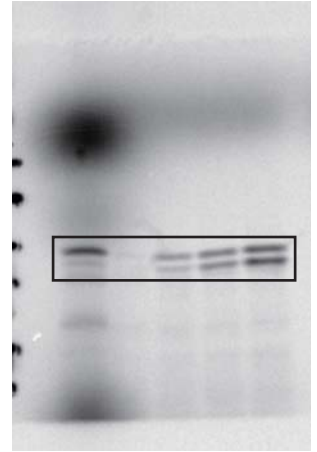

E15A

**Figure S1.** Full-length gel images for Fig. 4B
